# Supplementary material for: Metabolites Associated with the Main Nutrients in Two Varieties of Purple Rice Processed to Polished Rice
Source: MDPI journal article supplement (doi:10.3390/metabo13010007), 2022-12-20
Supplement: s1 [file s1]

**Table S1.** Linear equations for the 22 amino acids.

| Name     | Retention<br>Time<br>(min) | Limit of Quantitation<br>( $\mu\text{mol L}^{-1}$ ) | Standard Curves                  | Correlation<br>Coefficient | RSD<br>(%) |
|----------|----------------------------|-----------------------------------------------------|----------------------------------|----------------------------|------------|
| Ala*     | 3.06                       | 0.20–200.00                                         | $y = 15021.67602x + 1114.86403$  | 0.9941                     | 4.58       |
| Arg*     | 4.05                       | 0.10–100.00                                         | $y = 1.71579e5x + 8732.17518$    | 0.9932                     | 7.51       |
| Asn*     | 3.63                       | 0.10–200.00                                         | $y = 10174.75134x + 157.32107$   | 0.9941                     | 4.32       |
| Asp*     | 3.7                        | 1.00–200.00                                         | $y = 9770.16135x + 3639.59203$   | 0.9936                     | 10.34      |
| Cys-Cys* | 4.44                       | 1.00–50.00                                          | $y = 7864.19933x + 428.75388$    | 0.9923                     | 6          |
| Gln*     | 3.5                        | 0.20–200.00                                         | $y = 6.90956e4x - 3922.11721$    | 0.9931                     | 1.03       |
| Glu*     | 3.53                       | 0.50–200.00                                         | $y = 4.48104e4x + 6773.17141$    | 0.9925                     | 2.2        |
| Gly*     | 3.25                       | 1.00–200.00                                         | $y = 388.88034x + 558.13920$     | 0.9902                     | 4.41       |
| His*     | 4.1                        | 0.10–200.00                                         | $y = 3.13333e5x + 13058.78404$   | 0.9903                     | 3.58       |
| Ile*     | 2.08                       | 0.05–100.00                                         | $y = 3.71350e5x + 6255.03125$    | 0.997                      | 4.11       |
| Cys*     | 2.72                       | 1.00–100.00                                         | $y = 3270.36842x - 66.55676$     | 0.9919                     | 9.09       |
| Leu*     | 2.18                       | 0.05–200.00                                         | $y = 5.07006e5x + 330.38398$     | 0.9959                     | 2.02       |
| Hyp*     | 3.09                       | 0.20–200.00                                         | $y = 1.14593e5x - 78.65688$      | 0.9908                     | 1.35       |
| Trp*     | 2.07                       | 0.10–100.00                                         | $y = 3.05543e5x - 1609.02851$    | 0.9954                     | 0.96       |
| Lys*     | 4.11                       | 0.10–100.00                                         | $y = 1.03898e5x + 4624.88018$    | 0.9947                     | 6.64       |
| Met*     | 2.38                       | 0.10–200.00                                         | $y = 1.36250e5x + 2689.83467$    | 0.9924                     | 3.48       |
| Phe*     | 2.05                       | 0.02–50.00                                          | $y = 1.01293e6x + 5817.99176$    | 0.9976                     | 0.13       |
| Pro*     | 2.45                       | 0.02–200.00                                         | $y = 1.05969e6x + 15316.58513$   | 0.994                      | 2.59       |
| Ser*     | 3.55                       | 5.00–200.00                                         | $y = 10132.08262x + 21382.62182$ | 0.9903                     | 0.68       |
| Thr*     | 3.26                       | 0.20–200.00                                         | $y = 3.27639e4x + 729.62962$     | 0.9981                     | 3.04       |
| Tyr*     | 2.54                       | 0.20–20.00                                          | $y = 1.22910e5x + 9822.72634$    | 0.9906                     | 1.77       |
| Val*     | 2.45                       | 0.20–200.00                                         | $y = 4.84631e4x + 1579.34431$    | 0.9948                     | 2.66       |

\* - all concentrations are expressed in  $\mu\text{mol L}^{-1}$ .
