# Supplementary material for: Metabolites Associated with the Main Nutrients in Two Varieties of Purple Rice Processed to Polished Rice
Source: MDPI journal article supplement (doi:10.3390/metabo13010007), 2022-12-20
Supplement: s1 [file s1]

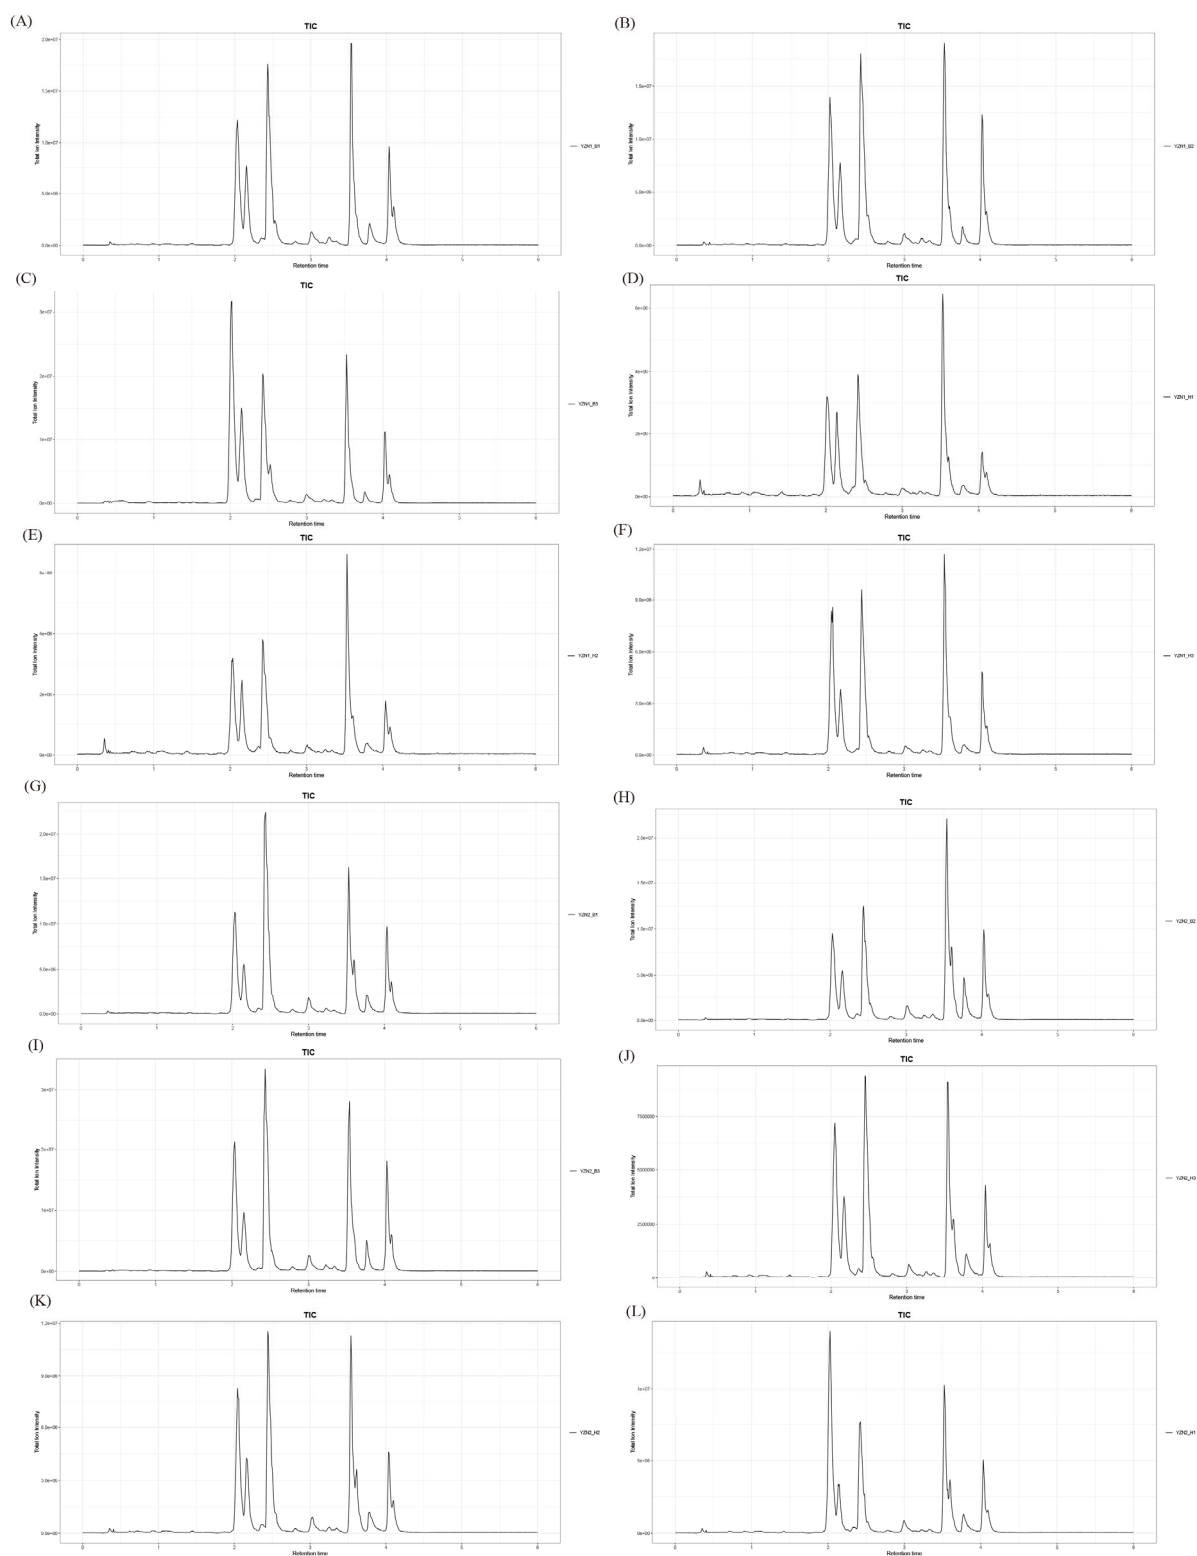

**Figure S1.** Total ion chromatogram (TIC) plots of the 12 samples. (A) YZN1\_B1; (B) YZN1\_B2; (C) YZN1\_B3; (D) YZN1\_H1; (E) YZN1\_H2; (F) YZN1\_H3; (G) YZN2\_B1; (H) YZN2\_B2; (I) YZN2\_B3; (J) YZN2\_H1; (K) YZN2\_H2; (L) YZN2\_H3.
