# Supplementary material for: Metabolites Associated with the Main Nutrients in Two Varieties of Purple Rice Processed to Polished Rice
Source: MDPI journal article supplement (doi:10.3390/metabo13010007), 2022-12-20
Supplement: s1 [file s1]

**Table S2.** Linear equations for ATP.

| Name | Retention<br>Time (min) | limit of Detection<br>( $\mu\text{g mL}^{-1}$ ) | Limit of Quantitation<br>( $\mu\text{g mL}^{-1}$ ) | Standard Curves        | Correlation<br>Coefficient |
|------|-------------------------|-------------------------------------------------|----------------------------------------------------|------------------------|----------------------------|
| ATP  | 6.959                   | 0.242                                           | 0.807                                              | $y = 6.1056x - 0.1847$ | 0.9999                     |
